# Supplementary material for: Lasing in perovskite crystallites grown via silver-nanowire-induced nucleation
Source: Royal Society of Chemistry journal article supplement (doi:10.1039/d3tc04300b), 2024-01-01
Supplement: d3tc04300b1.pdf [file d3tc04300b1.pdf]

## Lasing in perovskite crystallites grown via silver-nanowire-induced nucleation

Bin Liu, Junhan Guo, Yang Tang, Liang Qin\*, Zhidong Lou, Yufeng Hu, Feng Teng and Yanbing Hou\*

Key Laboratory of Luminescence and Optical Information Ministry of Education

Beijing JiaoTong University

Beijing 100044, P. R. China.

E-mail address: qinliang@bjtu.edu.cn; ybhou@bjtu.edu.cn

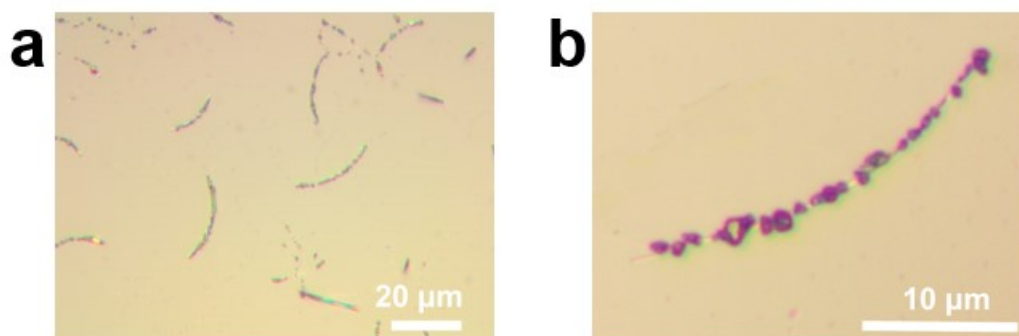

**Figure S1.** (a) and (b) Microscopy photographs of MAPbBr<sub>3</sub> crystallites grown on primary Ag nanowires.

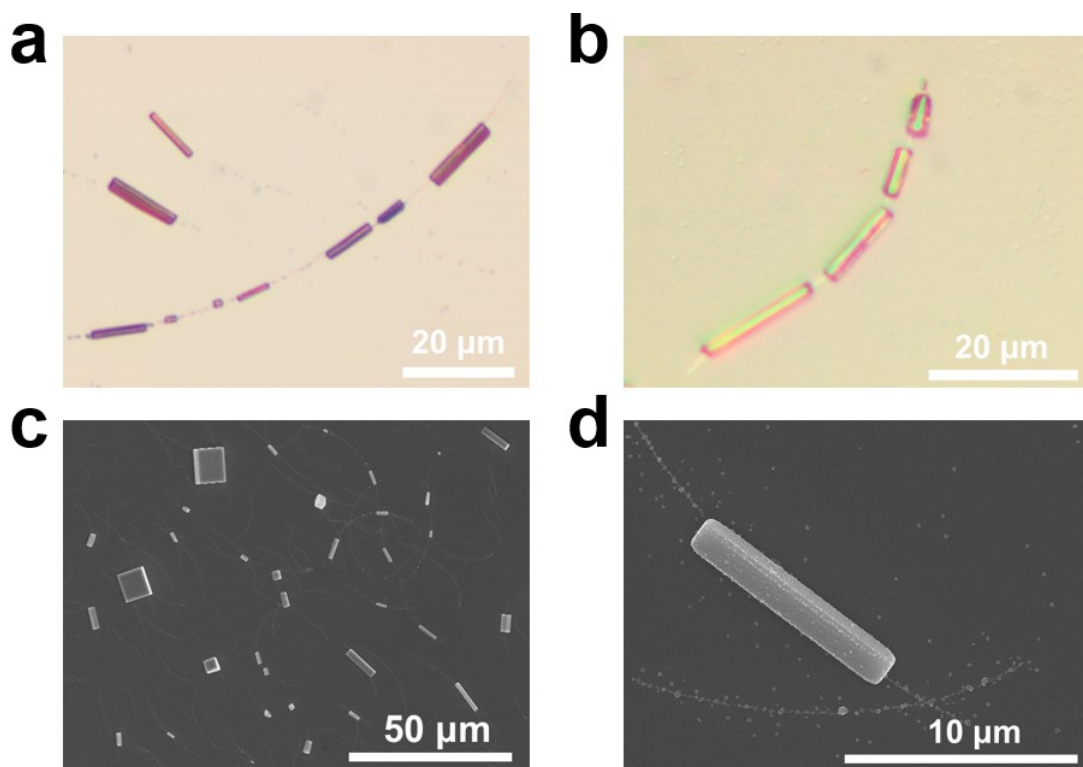

**Figure S2.** Microscopy photographs (a, b) and SEM images (c, d) of  $\text{MAPbBr}_3$  crystallites with large aspect ratios.  $\text{MAPbBr}_3$  crystallites grown on silver nanowires with diameters of 60 nm (a, c) and 90 nm (b, d), respectively.

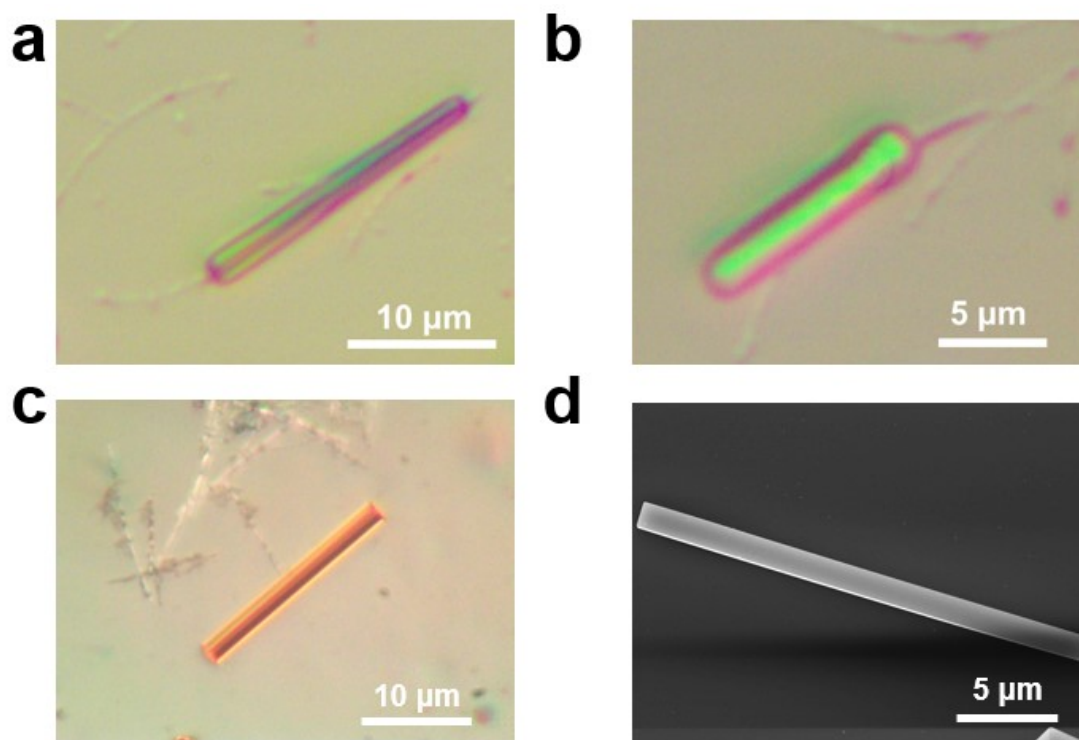

**Figure S3.** Microscopy photographs (a-c) and SEM image (d) of  $\text{MAPbBr}_3$  rod-shaped crystallite grown on silver nanowires with diameters of 30 nm and 120 nm.

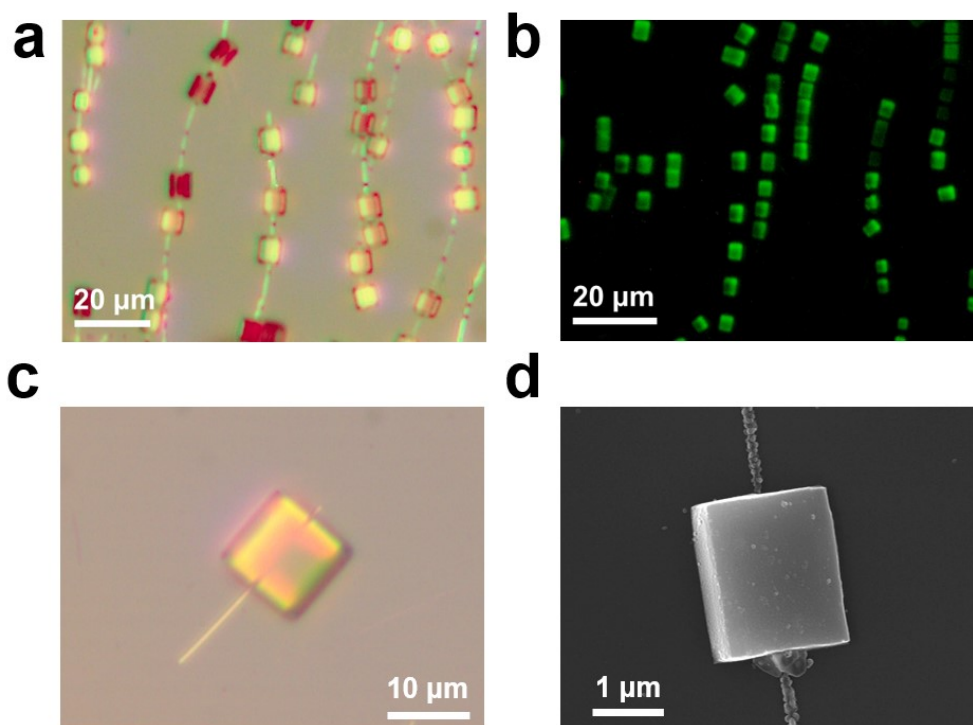

**Figure S4.** Microscopy photographs (a) and fluorescence microscopy images (b) of MAPbBr<sub>3</sub> crystallites with aspect ratio of about 1 (The concentration of precursor solution is 0.01 mmol/ml). Microscopy photograph (c) and SEM image (d) of single square MAPbBr<sub>3</sub> crystal.

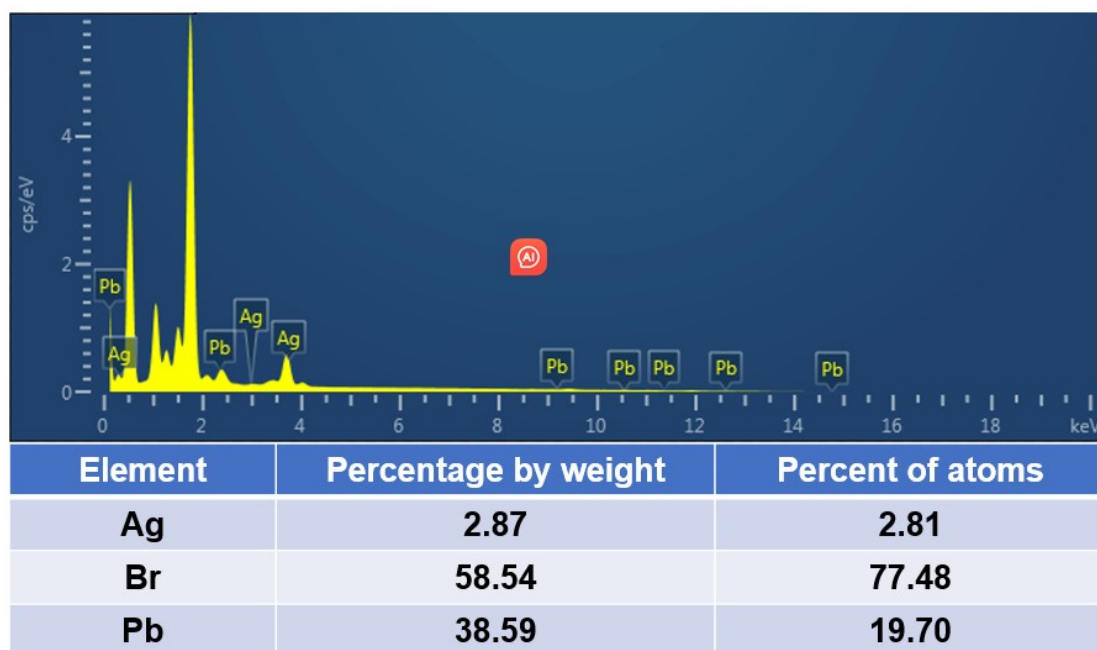

**Figure S5.** Element distribution of MAPbBr<sub>3</sub> crystal in **Figure S4d**.

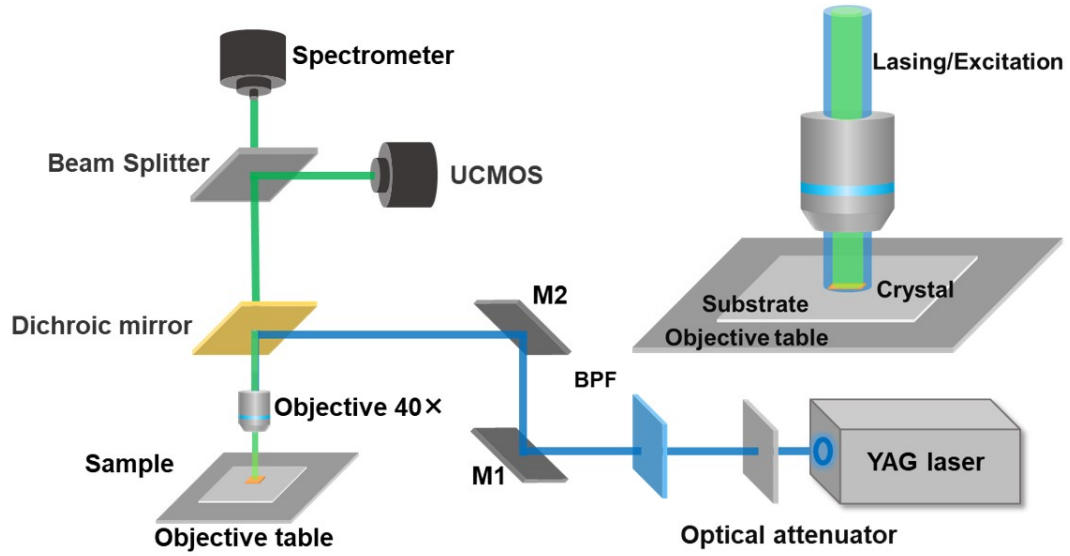

**Figure S6.** The schematic diagram for laser performance test of MAPbBr<sub>3</sub> crystallites.

**Table S1.** Laser thresholds of perovskite materials under different Pump pulse lengths

| Active Material     | Threshold                  | Pump Pulse Length | Reference |
|---------------------|----------------------------|-------------------|-----------|
| FAPbI <sub>3</sub>  | 3 $\mu\text{J cm}^{-2}$    | 150 fs            | 1         |
| FAPbI <sub>3</sub>  | 19.5 $\mu\text{J cm}^{-2}$ | 5 ns              | 1         |
| MAPbI <sub>3</sub>  | 12 $\mu\text{J cm}^{-2}$   | 150 fs            | 2         |
| MAPbI <sub>3</sub>  | 54.1 $\mu\text{J cm}^{-2}$ | 5 ns              | 3         |
| CsPbBr <sub>3</sub> | 3.3 $\mu\text{J cm}^{-2}$  | 150 fs            | 4         |
| CsPbBr <sub>3</sub> | 64.9 $\mu\text{J cm}^{-2}$ | 5.5 ns            | 4         |
| MAPbBr <sub>3</sub> | 15 $\mu\text{J cm}^{-2}$   | 80 fs             | 5         |
| MAPbBr <sub>3</sub> | 14 $\mu\text{J cm}^{-2}$   | 5 ns              | this work |

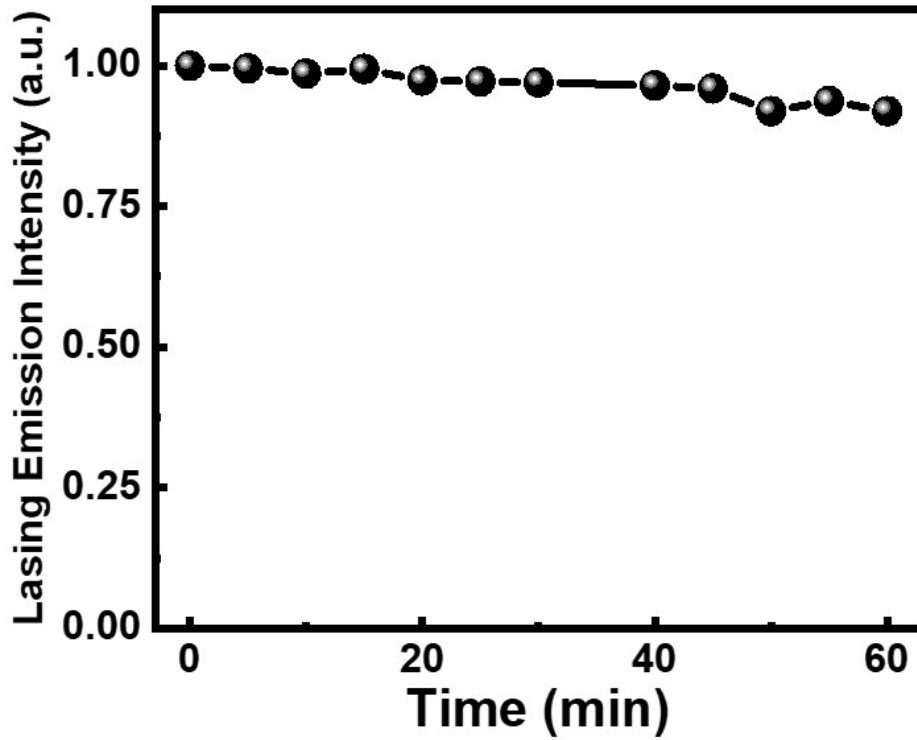

**Figure S7.** The stability of MAPbBr<sub>3</sub> crystallite under the continuous irradiation of a 450 nm pulsed laser (5 ns, 10 Hz) in air.

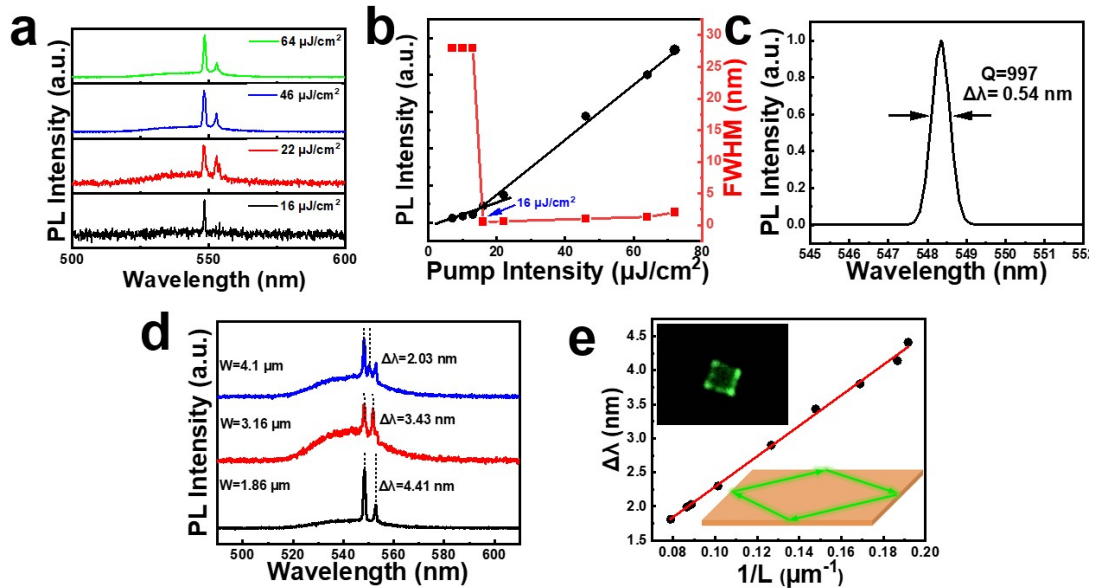

**Figure S8** (a) Pump intensity-dependent PL spectra of a MAPbBr<sub>3</sub> square crystallite embedded with silver nanowires excited at 450 nm (10 Hz, 5 ns); (b) PL intensity and FWHM as functions of pump intensity; (c) Gaussian fitting of a lasing peak at 548 nm, giving an FWHM of 0.54 nm, corresponding to a Q factor of 997. (d) The spacing  $\Delta\lambda$  between the two modes is calculated and plotted as a function of the reciprocal of the total internal reflection path  $L$  ( $L=2\sqrt{2}W$ ).

## References

1. F. Yuan, Z. Wu, H. Dong, J. Xi, K. Xi, G. Divitini, B. Jiao, X. Hou, S. Wang and Q. Gong, *The Journal of Physical Chemistry C*, 2017, **121**, 15318-15325.
2. G. Xing, N. Mathews, S. S. Lim, N. Yantara, X. Liu, D. Sabba, M. Gratzel, S. Mhaisalkar and T. C. Sum, *Nat Mater*, 2014, **13**, 476-480.
3. L. Qin, L. Lv, Y. Ning, C. Li, Q. Lu, L. Zhu, Y. Hu, Z. Lou, F. Teng and Y. Hou, *RSC Advances*, 2015, **5**, 103674-103679.
4. L. Zhang, F. Yuan, H. Dong, B. Jiao, W. Zhang, X. Hou, S. Wang, Q. Gong and Z. Wu, *ACS Applied Materials & Interfaces*, 2018, **10**, 40661-40671.
5. S. Zhang, Q. Shang, W. Du, J. Shi, Z. Wu, Y. Mi, J. Chen, F. Liu, Y. Li, M. Liu, Q. Zhang and X. Liu, *Advanced Optical Materials*, 2017, **6**.
